# Supplementary material
Source: PubMed Central journal article supplement (PMC9542407)
Supplement: ALZ-18-635-s001.pdf [file ALZ-18-635-s001.pdf]

**Table S1. Summary of statistical analyses**

| Marker             | Mixture modeling<br>cut-point<br>not requiring a<br>reference (n=874) | ROC methods to obtain Youden and<br>90% positive percent agreement cut points<br>(n=524 with CSF and amyloid PET) |                               |
|--------------------|-----------------------------------------------------------------------|-------------------------------------------------------------------------------------------------------------------|-------------------------------|
|                    |                                                                       | A+ versus A- reference*                                                                                           | A+ CI versus A- CU reference* |
| A $\beta$ 42       | ✓                                                                     | ✓                                                                                                                 | •                             |
| t-tau              | ✓                                                                     | •                                                                                                                 | ✓                             |
| p-tau              | ✓                                                                     | •                                                                                                                 | ✓                             |
| t-tau/A $\beta$ 42 | ✓                                                                     | ✓                                                                                                                 | •                             |
| p-tau/A $\beta$ 42 | ✓                                                                     | ✓                                                                                                                 | •                             |

\* Abnormal amyloid PET (A+) versus normal amyloid PET (A-) were defined based on mixture modeling

✓ Obtained cut-points are of primary interest

• Obtained cut-points based on a reference group that is not of primary interest (sensitivity)

Abbreviations: A+, abnormal amyloid PET; A-, normal amyloid PET; CI, cognitively impaired (including mild cognitive impairment and AD dementia); CU, cognitively unimpaired

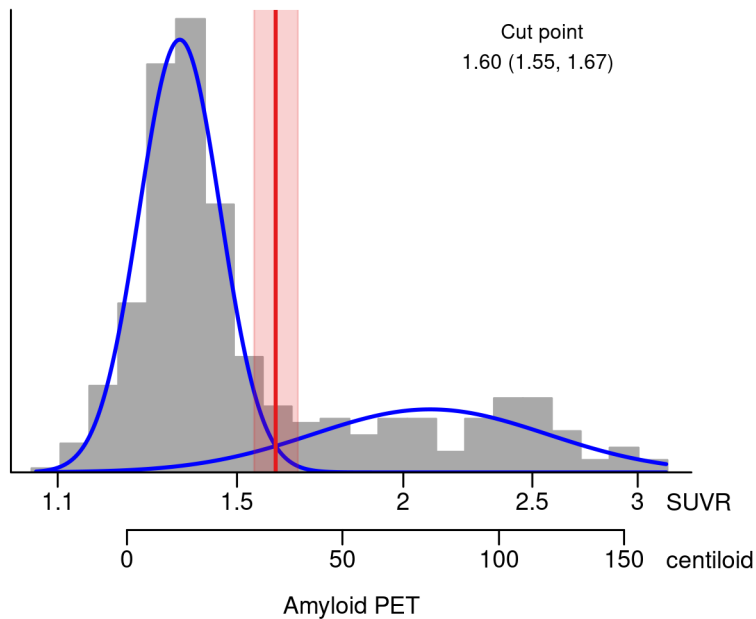

**Figure S1. Amyloid PET Cut point.** Histogram of amyloid PET in the CSF+PET subset with estimated probability density curves of the two groups identified through univariate mixture modeling (blue). The optimal cut point with 95% bootstrap confidence interval (CI) is shown in red. The centiloid scale is shown below the SUVR scale. The cut point of 1.60 (95% CI 1.55–1.67) corresponds to 32 (95% CI 28–38) centiloid.

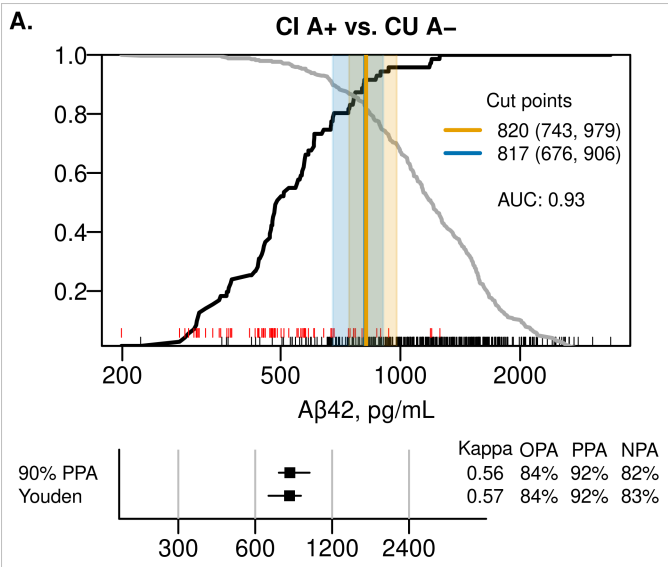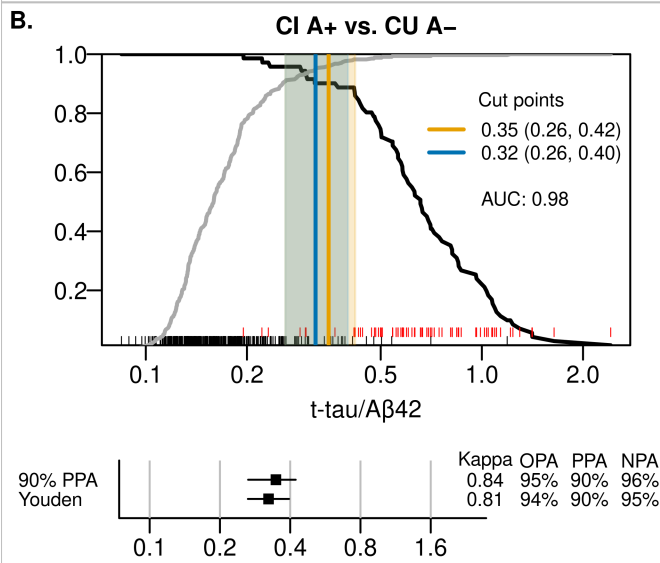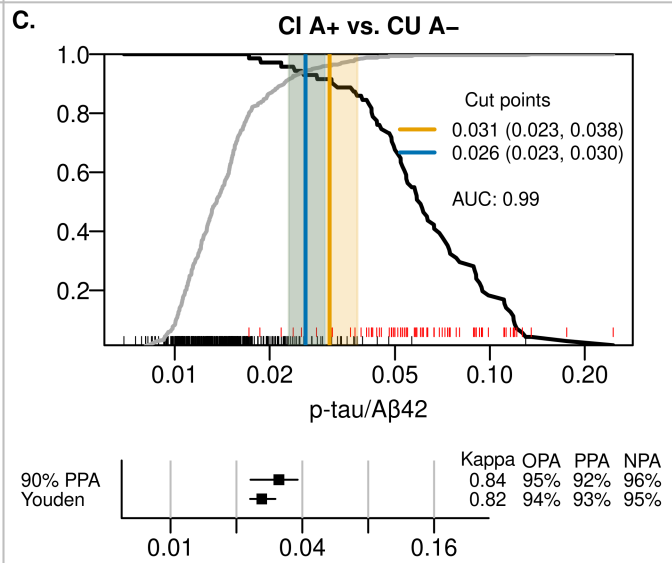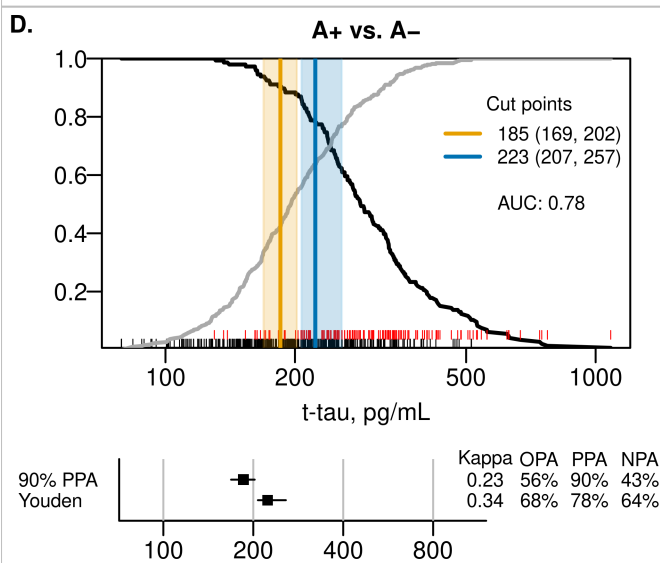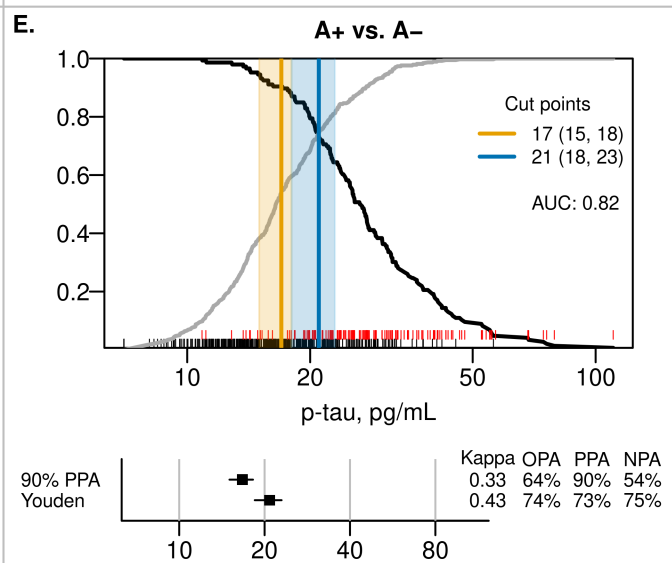

**Figure S2. Sensitivity Analyses.** In the main ROC analyses, the reference of A+ vs. A- was used for Aβ42 and the t-tau/Aβ42 and p-tau/Aβ42 ratios while the reference of cognitively impaired (CI) A+ vs. cognitively unimpaired (CU) A- was used as the reference for t-tau and p-tau. In sensitivity analyses, the ROC analyses were repeated with the reference not used in the primary analysis.

Panels A–C show the ROC analyses for CI A+ vs. CU A– for A $\beta$ 42, t-tau/A $\beta$ 42, and p-tau/A $\beta$ 42. Panels D and E show the ROC analyses for A+ vs. A– for t-tau and p-tau. A+ was defined as amyloid PET  $\geq$  1.60 SUVR (32 centiloid). The figures show positive percent agreement (PPA, black line) and negative percent agreement (NPA, grey line). The cut point (95% bootstrap confidence interval) that results in 90% PPA is shown in orange and the Youden method cut point is shown in blue. Rug plots at the bottom of each panel indicate CSF values for cases (A+ or CI A+, red) and controls (A– or CU A–, black). Kappa, overall percent agreement (OPA), PPA, and NPA are reported using the respective references.
